# Supplementary material for: The geologic history of marine dissolved organic carbonfrom iron oxides
Source: Research Square preprint supplement (doi:10.21203/rs.3.rs-3918060/v1), 2024-05-07
Supplement: Supplementary file 1 [file 29a00fb818a0df82251daf00.xlsx]

## Sheet: Dataset S2
pH	Temperature (°C)	Time (days)	Fe(III) source	DOC type	DOC addition	Fe-OC (wt. %)	δ13C (‰, VPDB)	Δ13C (‰)	Protocol stage	DOC/Fe(III)	Fe (mM)	C (mM)
1.47	75	7	FeCl3x6H2O	Fulvic acid	post	0.0457955	-17.2829	3.36194	raw	0.00349401	127.362	0.445004
1.47	75	7	FeCl3x6H2O	Fulvic acid	post	0.0428863	-18.2091	4.28813	raw	0.00349401	127.362	0.445004
1.47	75	7	FeCl3x6H2O	Fulvic acid	post	0.039043	-18.0809	4.15993	raw	0.00349401	127.362	0.445004
1.47	75	7	FeCl3x6H2O	Fulvic acid	post	0.0404516	-18.091	4.17004	raw	0.00349401	127.362	0.445004
1.47	75	7	FeCl3x6H2O	Fulvic acid	post	0.0590166	-22.3362	8.41521	-Fh/PC	0.00349401	127.362	0.445004
1.47	75	7	FeCl3x6H2O	Fulvic acid	post	0.0600224	-22.3088	8.38784	-Fh/PC	0.00349401	127.362	0.445004
1.47	75	7	FeCl3x6H2O	Fulvic acid	post	0.0594112	-22.7075	8.78647	-Fh/PC	0.00349401	127.362	0.445004
1.47	75	7	FeCl3x6H2O	Fulvic acid	post	0.0503611	-23.3545	9.43353	-Fh/PC -ads. OC	0.00349401	127.362	0.445004
1.47	75	7	FeCl3x6H2O	Fulvic acid	post	0.0448175	-22.5905	8.66951	-Fh/PC -ads. OC	0.00349401	127.362	0.445004
1.47	75	7	FeCl3x6H2O	Fulvic acid	post	0.0474122	-23.0155	9.09454	-Fh/PC -ads. OC	0.00349401	127.362	0.445004
1.47	75	7	FeCl3x6H2O	Fulvic acid	post	0.0157772	-16.976	3.05499	raw	0.00127055	127.362	0.16182
1.47	75	7	FeCl3x6H2O	Fulvic acid	post	0.015255	-17.3036	3.38262	raw	0.00127055	127.362	0.16182
1.47	75	7	FeCl3x6H2O	Fulvic acid	post	0.015831	-17.2561	3.33506	raw	0.00127055	127.362	0.16182
1.47	75	7	FeCl3x6H2O	Fulvic acid	post	0.026132	-23.2995	9.37849	-Fh/PC	0.00127055	127.362	0.16182
1.47	75	7	FeCl3x6H2O	Fulvic acid	post	0.0257079	-23.453	9.53195	-Fh/PC	0.00127055	127.362	0.16182
1.47	75	7	FeCl3x6H2O	Fulvic acid	post	0.0248917	-23.5978	9.67676	-Fh/PC	0.00127055	127.362	0.16182
1.47	75	7	FeCl3x6H2O	Fulvic acid	post	0.0205799	-23.9364	10.0154	-Fh/PC -ads. OC	0.00127055	127.362	0.16182
1.47	75	7	FeCl3x6H2O	Fulvic acid	post	0.0202958	-23.9076	9.98657	-Fh/PC -ads. OC	0.00127055	127.362	0.16182
1.47	75	7	FeCl3x6H2O	Fulvic acid	post	0.0229007	-24.5133	10.5923	-Fh/PC -ads. OC	0.00127055	127.362	0.16182
1.47	75	7	FeCl3x6H2O	Fulvic acid	post	0.332764	-18.5866	4.66561	raw	0.0232329	127.362	2.95899
1.47	75	7	FeCl3x6H2O	Fulvic acid	post	0.351548	-18.8939	4.97292	raw	0.0232329	127.362	2.95899
1.47	75	7	FeCl3x6H2O	Fulvic acid	post	0.343141	-19.0528	5.13184	raw	0.0232329	127.362	2.95899
1.47	75	7	FeCl3x6H2O	Fulvic acid	post	0.380639	-18.1821	4.26109	-Fh/PC	0.0232329	127.362	2.95899
1.47	75	7	FeCl3x6H2O	Fulvic acid	post	0.386012	-18.2555	4.33453	-Fh/PC	0.0232329	127.362	2.95899
1.47	75	7	FeCl3x6H2O	Fulvic acid	post	0.364203	-18.6833	4.76226	-Fh/PC	0.0232329	127.362	2.95899
1.47	75	7	FeCl3x6H2O	Fulvic acid	post	0.292021	-18.696	4.77497	-Fh/PC -ads. OC	0.0232329	127.362	2.95899
1.47	75	7	FeCl3x6H2O	Fulvic acid	post	0.282464	-18.6214	4.70043	-Fh/PC -ads. OC	0.0232329	127.362	2.95899
1.47	75	7	FeCl3x6H2O	Fulvic acid	post	0.301397	-19.3531	5.43214	-Fh/PC -ads. OC	0.0232329	127.362	2.95899
1.47	75	7	FeCl3x6H2O	Fulvic acid	post	0.931155	-13.7251	-0.195893	raw	0.136539	127.362	17.3898
1.47	75	7	FeCl3x6H2O	Fulvic acid	post	0.966029	-13.5406	-0.380385	raw	0.136539	127.362	17.3898
1.47	75	7	FeCl3x6H2O	Fulvic acid	post	0.941489	-13.7511	-0.169865	raw	0.136539	127.362	17.3898
1.47	75	7	FeCl3x6H2O	Fulvic acid	post	0.924011	-13.4948	-0.426244	-Fh/PC	0.136539	127.362	17.3898
1.47	75	7	FeCl3x6H2O	Fulvic acid	post	0.885818	-13.4921	-0.428864	-Fh/PC	0.136539	127.362	17.3898
1.47	75	7	FeCl3x6H2O	Fulvic acid	post	0.937485	-13.5531	-0.367893	-Fh/PC	0.136539	127.362	17.3898
1.47	75	7	FeCl3x6H2O	Fulvic acid	post	0.927083	-14.8531	0.932119	-Fh/PC -ads. OC	0.136539	127.362	17.3898
1.47	75	7	FeCl3x6H2O	Fulvic acid	post	0.94748	-14.7428	0.821843	-Fh/PC -ads. OC	0.136539	127.362	17.3898
1.47	75	7	FeCl3x6H2O	Fulvic acid	post	0.899083	-14.6788	0.757791	-Fh/PC -ads. OC	0.136539	127.362	17.3898
1.47	75	7	FeCl3x6H2O	Fulvic acid	post	0.239863	-20.0025	6.0815	raw	0.0132954	127.362	1.69333
1.47	75	7	FeCl3x6H2O	Fulvic acid	post	0.235044	-19.8563	5.93528	raw	0.0132954	127.362	1.69333
1.47	75	7	FeCl3x6H2O	Fulvic acid	post	0.235863	-20.0586	6.13756	raw	0.0132954	127.362	1.69333
1.47	75	7	FeCl3x6H2O	Fulvic acid	post	0.179988	-17.3278	3.40678	-Fh/PC	0.0132954	127.362	1.69333
1.47	75	7	FeCl3x6H2O	Fulvic acid	post	0.192068	-17.5772	3.65623	-Fh/PC	0.0132954	127.362	1.69333
1.47	75	7	FeCl3x6H2O	Fulvic acid	post	0.176846	-18.0753	4.15427	-Fh/PC	0.0132954	127.362	1.69333
1.47	75	7	FeCl3x6H2O	Fulvic acid	post	0.157705	-18.3472	4.42625	-Fh/PC -ads. OC	0.0132954	127.362	1.69333
1.47	75	7	FeCl3x6H2O	Fulvic acid	post	0.153644	-18.6816	4.76058	-Fh/PC -ads. OC	0.0132954	127.362	1.69333
1.47	75	7	FeCl3x6H2O	Fulvic acid	post	0.160142	-18.6048	4.6838	-Fh/PC -ads. OC	0.0132954	127.362	1.69333
1.47	90	14	FeCl3x6H2O	Fulvic acid	post	0.121128	-22.5266	8.60564	-Fh/PC	0.0081387	19.997	0.16275
1.47	90	14	FeCl3x6H2O	Fulvic acid	post	0.119659	-22.2328	8.31182	-Fh/PC	0.0081387	19.997	0.16275
1.47	90	14	FeCl3x6H2O	Fulvic acid	post	0.115683	-22.5269	8.6059	-Fh/PC	0.0081387	19.997	0.16275
1.36	90	14	FeCl3x6H2O	Fulvic acid	post	0.101153	-25.3065	11.3855	-Fh/PC	0.0169233	19.997	0.338417
1.36	90	14	FeCl3x6H2O	Fulvic acid	post	0.10528	-25.5688	11.6478	-Fh/PC	0.0169233	19.997	0.338417
1.36	90	14	FeCl3x6H2O	Fulvic acid	post	0.105976	-25.3344	11.4134	-Fh/PC	0.0169233	19.997	0.338417
1.36	90	14	FeCl3x6H2O	Fulvic acid	post	0.364087	-18.9115	4.99048	-Fh/PC	0.0645929	19.997	1.29167
1.36	90	14	FeCl3x6H2O	Fulvic acid	post	0.376947	-19.0993	5.17831	-Fh/PC	0.0645929	19.997	1.29167
1.36	90	14	FeCl3x6H2O	Fulvic acid	post	0.341132	-19.1839	5.26287	-Fh/PC	0.0645929	19.997	1.29167
1.38	90	14	FeCl3x6H2O	Fulvic acid	post	0.212216	-20.2883	6.36733	-Fh/PC	0.0405643	19.997	0.811167
1.38	90	14	FeCl3x6H2O	Fulvic acid	post	0.226644	-20.3379	6.41694	-Fh/PC	0.0405643	19.997	0.811167
1.38	90	14	FeCl3x6H2O	Fulvic acid	post	0.219635	-20.3653	6.44429	-Fh/PC	0.0405643	19.997	0.811167
1.42	90	14	FeCl3x6H2O	Fulvic acid	post	1.29355	-16.9709	3.0499	-Fh/PC	0.264185	19.997	5.28292
1.42	90	14	FeCl3x6H2O	Fulvic acid	post	1.29398	-17.4037	3.48269	-Fh/PC	0.264185	19.997	5.28292
1.42	90	14	FeCl3x6H2O	Fulvic acid	post	1.28654	-16.8802	2.95921	-Fh/PC	0.264185	19.997	5.28292
1.42	90	14	FeCl3x6H2O	Fulvic acid	post	1.50876	-17.9115	3.99046	-Fh/PC	0.310692	19.997	6.21292
1.42	90	14	FeCl3x6H2O	Fulvic acid	post	1.49317	-17.994	4.07302	-Fh/PC	0.310692	19.997	6.21292
1.42	90	14	FeCl3x6H2O	Fulvic acid	post	1.49945	-18.5886	4.66755	-Fh/PC	0.310692	19.997	6.21292
8	50	14	FeCl3x6H2O	Fulvic acid	post	0.328734	-13.5453	-0.375671	-Fh/PC -ads. OC	0.0625321	56.8515	3.55505
8	50	14	FeCl3x6H2O	Fulvic acid	post	0.317341	-13.5149	-0.406057	-Fh/PC -ads. OC	0.0625321	56.8515	3.55505
8	50	14	FeCl3x6H2O	Fulvic acid	post	0.309624	-13.5293	-0.391672	-Fh/PC -ads. OC	0.0625321	56.8515	3.55505
8	50	14	FeCl3x6H2O	Fulvic acid	post	0.449647	-14.5513	0.630272	-Fh/PC -ads. OC	0.125064	28.4258	3.55505
8	50	14	FeCl3x6H2O	Fulvic acid	post	0.432676	-14.6147	0.693726	-Fh/PC -ads. OC	0.125064	28.4258	3.55505
8	50	14	FeCl3x6H2O	Fulvic acid	post	0.430551	-14.6076	0.686585	-Fh/PC -ads. OC	0.125064	28.4258	3.55505
8	50	14	FeCl3x6H2O	Fulvic acid	post	0.140851	-8.51129	-5.40971	-Fh/PC -ads. OC	0.0142118	250.147	3.55505
8	50	14	FeCl3x6H2O	Fulvic acid	post	0.14177	-8.39628	-5.52472	-Fh/PC -ads. OC	0.0142118	250.147	3.55505
8	50	14	FeCl3x6H2O	Fulvic acid	post	0.141093	-8.53164	-5.38936	-Fh/PC -ads. OC	0.0142118	250.147	3.55505
8	50	30	FeCl3x6H2O	M-DOC	post	0.538892	-16.0022	-1.42178	raw	0.208194	113.703	23.6722
8	50	30	FeCl3x6H2O	M-DOC	post	0.494981	-15.759	-1.66499	raw	0.208194	113.703	23.6722
8	50	30	FeCl3x6H2O	M-DOC	post	0.463925	-14.884	-2.53996	raw	0.208194	113.703	23.6722
8	50	30	FeCl3x6H2O	M-DOC	post	0.388829	-17.3515	-0.0725014	-Fh/PC	0.208194	113.703	23.6722
8	50	30	FeCl3x6H2O	M-DOC	post	0.387627	-17.4645	0.0405272	-Fh/PC	0.208194	113.703	23.6722
8	50	30	FeCl3x6H2O	M-DOC	post	0.384453	-17.5009	0.0768578	-Fh/PC	0.208194	113.703	23.6722
8	50	30	FeCl3x6H2O	M-DOC	post	0.33127	-16.6794	-0.744618	-Fh/PC -ads. OC	0.208194	113.703	23.6722
8	50	30	FeCl3x6H2O	M-DOC	post	0.369286	-17.2193	-0.204704	-Fh/PC -ads. OC	0.208194	113.703	23.6722
8	50	30	FeCl3x6H2O	M-DOC	post	0.35743	-17.2909	-0.133052	-Fh/PC -ads. OC	0.208194	113.703	23.6722
8	50	30	FeCl3x6H2O	M-DOC	post	0.469117	-15.6107	-1.81334	raw	0.208194	113.703	23.6722
8	50	30	FeCl3x6H2O	M-DOC	post	0.457794	-15.6954	-1.72857	raw	0.208194	113.703	23.6722
8	50	30	FeCl3x6H2O	M-DOC	post	0.48023	-15.8276	-1.59637	raw	0.208194	113.703	23.6722
8	50	30	FeCl3x6H2O	M-DOC	post	0.390359	-17.5947	0.170712	-Fh/PC	0.208194	113.703	23.6722
8	50	30	FeCl3x6H2O	M-DOC	post	0.398173	-17.954	0.529981	-Fh/PC	0.208194	113.703	23.6722
8	50	30	FeCl3x6H2O	M-DOC	post	0.40052	-17.741	0.317043	-Fh/PC	0.208194	113.703	23.6722
8	50	30	FeCl3x6H2O	M-DOC	post	0.388127	-17.9399	0.515853	-Fh/PC	0.208194	113.703	23.6722
8	50	30	FeCl3x6H2O	M-DOC	post	0.31894	-16.2475	-1.17652	-Fh/PC -ads. OC	0.208194	113.703	23.6722
8	50	30	FeCl3x6H2O	M-DOC	post	0.319057	-16.0979	-1.3261	-Fh/PC -ads. OC	0.208194	113.703	23.6722
8	50	30	FeCl3x6H2O	M-DOC	post	0.292873	-16.1731	-1.25088	-Fh/PC -ads. OC	0.208194	113.703	23.6722
8	50	30	FeCl3x6H2O	M-DOC	post	0.183013	-12.1984	-5.22555	raw	0.0208194	113.703	2.36722
8	50	30	FeCl3x6H2O	M-DOC	post	0.181039	-12.0576	-5.36642	raw	0.0208194	113.703	2.36722
8	50	30	FeCl3x6H2O	M-DOC	post	0.179995	-11.8612	-5.5628	raw	0.0208194	113.703	2.36722
8	50	30	FeCl3x6H2O	M-DOC	post	0.142174	-14.2691	-3.15493	-Fh/PC	0.0208194	113.703	2.36722
8	50	30	FeCl3x6H2O	M-DOC	post	0.147027	-14.2758	-3.14817	-Fh/PC	0.0208194	113.703	2.36722
8	50	30	FeCl3x6H2O	M-DOC	post	0.127879	-14.2917	-3.13231	-Fh/PC	0.0208194	113.703	2.36722
8	50	30	FeCl3x6H2O	M-DOC	post	0.136123	-12.5739	-4.8501	-Fh/PC -ads. OC	0.0208194	113.703	2.36722
8	50	30	FeCl3x6H2O	M-DOC	post	0.120582	-12.7297	-4.69434	-Fh/PC -ads. OC	0.0208194	113.703	2.36722
8	50	30	FeCl3x6H2O	M-DOC	post	0.132057	-12.761	-4.66305	-Fh/PC -ads. OC	0.0208194	113.703	2.36722
8	50	30	FeCl3x6H2O	M-DOC	post	0.22967	-12.148	-5.27595	raw	0.0208194	113.703	2.36722
8	50	30	FeCl3x6H2O	M-DOC	post	0.167338	-11.8532	-5.5708	raw	0.0208194	113.703	2.36722
8	50	30	FeCl3x6H2O	M-DOC	post	0.196712	-11.9293	-5.49465	raw	0.0208194	113.703	2.36722
8	50	30	FeCl3x6H2O	M-DOC	post	0.138833	-14.0423	-3.38169	-Fh/PC	0.0208194	113.703	2.36722
8	50	30	FeCl3x6H2O	M-DOC	post	0.126373	-14.1481	-3.27591	-Fh/PC	0.0208194	113.703	2.36722
8	50	30	FeCl3x6H2O	M-DOC	post	0.177801	-13.8469	-3.57706	-Fh/PC	0.0208194	113.703	2.36722
8	50	30	FeCl3x6H2O	M-DOC	post	0.11325	-12.0446	-5.37936	-Fh/PC -ads. OC	0.0208194	113.703	2.36722
8	50	30	FeCl3x6H2O	M-DOC	post	0.174734	-12.4745	-4.94954	-Fh/PC -ads. OC	0.0208194	113.703	2.36722
8	50	30	FeCl3x6H2O	M-DOC	post	0.117297	-12.197	-5.22703	-Fh/PC -ads. OC	0.0208194	113.703	2.36722
8	50	30	FeCl3x6H2O	M-DOC	post	0.0216183	-12.1613	-5.26272	raw	0.00208194	113.703	0.236722
8	50	30	FeCl3x6H2O	M-DOC	post	0.0198934	-12.024	-5.39997	raw	0.00208194	113.703	0.236722
8	50	30	FeCl3x6H2O	M-DOC	post	0.0214074	-12.1408	-5.28324	raw	0.00208194	113.703	0.236722
8	50	30	FeCl3x6H2O	M-DOC	post	0.0148343	-15.0125	-2.41153	-Fh/PC	0.00208194	113.703	0.236722
8	50	30	FeCl3x6H2O	M-DOC	post	0.0149085	-15.1131	-2.31086	-Fh/PC	0.00208194	113.703	0.236722
8	50	30	FeCl3x6H2O	M-DOC	post	0.0179588	-14.6087	-2.81527	-Fh/PC	0.00208194	113.703	0.236722
8	50	30	FeCl3x6H2O	M-DOC	post	0.0128119	-10.65	-6.77399	-Fh/PC -ads. OC	0.00208194	113.703	0.236722
8	50	30	FeCl3x6H2O	M-DOC	post	0.0123853	-10.9653	-6.45865	-Fh/PC -ads. OC	0.00208194	113.703	0.236722
8	50	30	FeCl3x6H2O	M-DOC	post	0.00980083	-11.8321	-5.59192	-Fh/PC -ads. OC	0.00208194	113.703	0.236722
8	50	30	FeCl3x6H2O	M-DOC	post	0.0189866	-13.8186	-3.6054	raw	0.00208194	113.703	0.236722
8	50	30	FeCl3x6H2O	M-DOC	post	0.0275209	-13.6216	-3.80238	raw	0.00208194	113.703	0.236722
8	50	30	FeCl3x6H2O	M-DOC	post	0.0210826	-13.4529	-3.97114	raw	0.00208194	113.703	0.236722
8	50	30	FeCl3x6H2O	M-DOC	post	0.0196599	-12.3885	-5.03554	-Fh/PC	0.00208194	113.703	0.236722
8	50	30	FeCl3x6H2O	M-DOC	post	0.0165095	-12.6633	-4.76071	-Fh/PC	0.00208194	113.703	0.236722
8	50	30	FeCl3x6H2O	M-DOC	post	0.0142149	-13.1299	-4.29411	-Fh/PC	0.00208194	113.703	0.236722
8	50	30	FeCl3x6H2O	M-DOC	post	0.013806	-11.4766	-5.94736	-Fh/PC -ads. OC	0.00208194	113.703	0.236722
8	50	30	FeCl3x6H2O	M-DOC	post	0.0139202	-10.6163	-6.80771	-Fh/PC -ads. OC	0.00208194	113.703	0.236722
8	50	30	FeCl3x6H2O	M-DOC	post	0.0212474	-11.0499	-6.37409	-Fh/PC -ads. OC	0.00208194	113.703	0.236722
8	50	5	FeCl3x6H2O	M-DOC	post	0.0211021	-8.37235	-9.05165	-Fh/PC	0.000907724	113.703	0.103211
8	50	5	FeCl3x6H2O	M-DOC	post	0.0214857	-8.27064	-9.15336	-Fh/PC	0.000907724	113.703	0.103211
8	50	5	FeCl3x6H2O	M-DOC	post	0.0212515	-8.79349	-8.63051	-Fh/PC	0.000907724	113.703	0.103211
8	50	5	FeCl3x6H2O	M-DOC	post	0.0186642	-8.82317	-8.60083	-Fh/PC	0.000907724	113.703	0.103211
8	50	5	FeCl3x6H2O	M-DOC	post	0.0186772	-6.93274	-10.4913	-Fh/PC -ads. OC	0.000907724	113.703	0.103211
8	50	5	FeCl3x6H2O	M-DOC	post	0.0184222	-7.3771	-10.0469	-Fh/PC -ads. OC	0.000907724	113.703	0.103211
8	50	5	FeCl3x6H2O	M-DOC	post	0.0149596	-6.55439	-10.8696	-Fh/PC -ads. OC	0.000907724	113.703	0.103211
8	50	5	FeCl3x6H2O	M-DOC	post	0.0155559	-7.13316	-10.2908	-Fh/PC -ads. OC	0.00181545	113.703	0.206422
8	50	5	FeCl3x6H2O	M-DOC	post	0.0096298	-7.18213	-10.2419	-Fh/PC -ads. OC	0.00181545	113.703	0.206422
8	50	5	FeCl3x6H2O	M-DOC	post	0.015413	-6.71608	-10.7079	-Fh/PC -ads. OC	0.00181545	113.703	0.206422
8	50	5	FeCl3x6H2O	M-DOC	post	0.144138	-11.3219	-6.10214	-Fh/PC -ads. OC	0.0181545	113.703	2.06422
8	50	5	FeCl3x6H2O	M-DOC	post	0.142238	-11.1018	-6.32215	-Fh/PC -ads. OC	0.0181545	113.703	2.06422
8	50	5	FeCl3x6H2O	M-DOC	post	0.14117	-10.8484	-6.57564	-Fh/PC -ads. OC	0.0181545	113.703	2.06422
8	50	5	FeCl3x6H2O	M-DOC	post	0.267124	-13.6669	-3.75708	-Fh/PC -ads. OC	0.036309	113.703	4.12844
8	50	5	FeCl3x6H2O	M-DOC	post	0.269244	-13.5939	-3.83015	-Fh/PC -ads. OC	0.036309	113.703	4.12844
8	50	5	FeCl3x6H2O	M-DOC	post	0.269345	-13.4778	-3.94623	-Fh/PC -ads. OC	0.036309	113.703	4.12844
8	50	14	FeCl3x6H2O	M-DOC	post	0.280274	-15.6762	-1.74782	-Fh/PC -ads. OC	0.0706007	56.8515	4.01376
8	50	14	FeCl3x6H2O	M-DOC	post	0.281145	-15.9135	-1.51048	-Fh/PC -ads. OC	0.0706007	56.8515	4.01376
8	50	14	FeCl3x6H2O	M-DOC	post	0.277803	-15.7104	-1.7136	-Fh/PC -ads. OC	0.0706007	56.8515	4.01376
8	50	14	FeCl3x6H2O	M-DOC	post	0.121354	-9.54067	-7.88333	-Fh/PC -ads. OC	0.00825204	250.147	2.06422
8	50	14	FeCl3x6H2O	M-DOC	post	0.122027	-9.92887	-7.49513	-Fh/PC -ads. OC	0.00825204	250.147	2.06422
8	50	14	FeCl3x6H2O	M-DOC	post	0.123892	-9.22483	-8.19917	-Fh/PC -ads. OC	0.00825204	250.147	2.06422
8	50	5	FeCl3x6H2O	C-DOC	post	0.00669343	-5.30693	-20.6301	-Fh/PC -ads. OC	0.000353004	113.703	0.0401376
8	50	5	FeCl3x6H2O	C-DOC	post	0.00667397	-5.1895	-20.7475	-Fh/PC -ads. OC	0.000353004	113.703	0.0401376
8	50	5	FeCl3x6H2O	C-DOC	post	0.0067126	-5.39653	-20.5405	-Fh/PC -ads. OC	0.000353004	113.703	0.0401376
8	50	5	FeCl3x6H2O	C-DOC	post	0.0386571	-7.54686	-18.3901	-Fh/PC -ads. OC	0.00353004	113.703	0.401376
8	50	5	FeCl3x6H2O	C-DOC	post	0.0416087	-8.66976	-17.2672	-Fh/PC -ads. OC	0.00353004	113.703	0.401376
8	50	5	FeCl3x6H2O	C-DOC	post	0.0396905	-7.54533	-18.3917	-Fh/PC -ads. OC	0.00353004	113.703	0.401376
8	50	5	FeCl3x6H2O	C-DOC	post	0.155408	-14.8631	-11.0739	-Fh/PC -ads. OC	0.031266	113.703	3.55505
8	50	5	FeCl3x6H2O	C-DOC	post	0.168746	-14.8484	-11.0886	-Fh/PC -ads. OC	0.031266	113.703	3.55505
8	50	5	FeCl3x6H2O	C-DOC	post	0.157495	-14.707	-11.23	-Fh/PC -ads. OC	0.031266	113.703	3.55505
8	50	5	FeCl3x6H2O	C-DOC	post	0.206963	-17.7098	-8.22716	-Fh/PC -ads. OC	0.0706007	113.703	8.02752
8	50	5	FeCl3x6H2O	C-DOC	post	0.203178	-17.5141	-8.42287	-Fh/PC -ads. OC	0.0706007	113.703	8.02752
8	50	5	FeCl3x6H2O	C-DOC	post	0.206046	-17.9578	-7.97924	-Fh/PC -ads. OC	0.0706007	113.703	8.02752
8	50	14	FeCl3x6H2O	C-DOC	post	0.203139	-19.8684	-6.06856	-Fh/PC -ads. OC	0.0706007	56.8515	4.01376
8	50	14	FeCl3x6H2O	C-DOC	post	0.203684	-19.7749	-6.16212	-Fh/PC -ads. OC	0.0706007	56.8515	4.01376
8	50	14	FeCl3x6H2O	C-DOC	post	0.200354	-19.8084	-6.12856	-Fh/PC -ads. OC	0.0706007	56.8515	4.01376
8	50	14	FeCl3x6H2O	C-DOC	post	0.287493	-22.9084	-3.02855	-Fh/PC -ads. OC	0.141201	28.4258	4.01376
8	50	14	FeCl3x6H2O	C-DOC	post	0.288363	-22.9326	-3.00438	-Fh/PC -ads. OC	0.141201	28.4258	4.01376
8	50	14	FeCl3x6H2O	C-DOC	post	0.281264	-23.2636	-2.6734	-Fh/PC -ads. OC	0.141201	28.4258	4.01376
8	50	14	FeCl3x6H2O	C-DOC	post	0.0995164	-9.77563	-16.1614	-Fh/PC -ads. OC	0.0160456	250.147	4.01376
8	50	14	FeCl3x6H2O	C-DOC	post	0.102526	-10.2272	-15.7098	-Fh/PC -ads. OC	0.0160456	250.147	4.01376
8	50	14	FeCl3x6H2O	C-DOC	post	0.103686	-10.019	-15.918	-Fh/PC -ads. OC	0.0160456	250.147	4.01376
