# Supplementary material for: The geologic history of marine dissolved organic carbonfrom iron oxides
Source: Research Square preprint supplement (doi:10.21203/rs.3.rs-3918060/v1), 2024-05-07
Supplement: Supplementary file 3 [file 35e9299210994a236a43614d.xlsx]

## Sheet: Dataset S3
Sample name	Age (Ma)	Period	Formation	Country	Depositional setting	Fe-Oxide mineral type	Organic carbon content	σ	δ13C	σ	Latitude	Paleolatitude
							(wt. %)	(wt. %)	(‰, VPDB)	(‰, VPDB)	(°)	(°)
IO-OM 1	0	Quaternary	Panarea Island	Italy	Marine	Goethite	0.1808	NA	-16.8037	NA	38.637	38.637
IO-OM 2	0	Quaternary	Panarea Island	Italy	Marine	Goethite	0.2148	0.0094	-17.6988	0.8519	38.637	38.637
IO-OM 3	0	Quaternary	Volcanic island Mahengetang	Indonesia	Marine	Goethite	0.3759	0.0531	-20.0877	0.6989	3.3	3.3
IO-OM 4	0	Quaternary	Volcanic island Mahengetang	Indonesia	Marine	Goethite	0.3463	0.0041	-17.8932	0.0714	3.3	3.3
IO-OM 5	27.5	Paleogene	Chegan	Kazakhstan	Channel iron deposit with marine influence	Goethite	0.2416	0.014	-21.7094	0.1348	54.38	52.9
IO-OM 6	27.5	Paleogene	Chegan	Kazakhstan	Channel iron deposit with marine influence	Goethite	0.1985	NA	-21.1307	NA	54.38	54.38
IO-OM 7	27.5	Paleogene	Chegan	Kazakhstan	Channel iron deposit with marine influence	Goethite	0.2489	NA	-21.1112	NA	54.38	54.38
IO-OM 8	27.5	Paleogene	Chegan	Kazakhstan	Channel iron deposit with marine influence	Goethite	0.1966	0.0066	-21.7768	0.1276	54.38	54.38
IO-OM 9	57.6	Paleogene	Lyulinvor	Russia	Marine	Goethite	0.1524	0.0036	-22.8186	0.0525	57.0295	55.15
IO-OM 10	57.6	Paleogene	Lyulinvor	Russia	Marine	Goethite	0.1578	0.004	-23.5245	0.2069	57.0295	55.15
IO-OM 11	57.6	Paleogene	Lyulinvor	Russia	Marine	Goethite	0.1445	NA	-23.1337	NA	57.0295	55.15
IO-OM 12	57.6	Paleogene	Lyulinvor	Russia	Marine	Goethite	0.1948	0.0231	-23.8567	0.1883	57.0295	55.15
IO-OM 13	57.6	Paleogene	Lyulinvor	Russia	Marine	Goethite	0.2761	0.0132	-24.4717	0.5129	57.0295	55.15
IO-OM 14	106.75	Cretaceous	Hatira	Israel	Marine	Goethite	0.3053	NA	-23.9872	NA	30.96	10.36
IO-OM 15	106.75	Cretaceous	Hatira	Israel	Marine	Goethite	0.6824	NA	-22.5887	NA	30.96	10.36
IO-OM 16	106.75	Cretaceous	Hatira	Israel	Marine	Goethite	0.2607	NA	-22.5666	NA	30.96	10.36
IO-OM 17	106.75	Cretaceous	Hatira	Israel	Marine	Goethite	0.3866	0.0071	-22.4697	0.1032	30.96	10.36
IO-OM 18	106.75	Cretaceous	Hatira	Israel	Marine	Goethite	0.393	NA	-22.3223	NA	30.96	10.36
IO-OM 19	106.75	Cretaceous	Hatira	Israel	Marine	Goethite	0.2771	0.0118	-21.4234	1.0283	30.96	10.36
IO-OM 20	106.75	Cretaceous	Hatira	Israel	Marine	Goethite	0.2468	0.021	-20.5182	0.0871	30.96	10.36
IO-OM 21	106.75	Cretaceous	Hatira	Israel	Marine	Goethite	0.3514	NA	-20.4487	NA	30.96	10.36
IO-OM 22	106.75	Cretaceous	Hatira	Israel	Marine	Goethite	0.2349	NA	-20.3999	NA	30.96	10.36
IO-OM 23	106.75	Cretaceous	Hatira	Israel	Marine	Goethite	0.4461	NA	-20.3834	NA	30.96	10.36
IO-OM 24	106.75	Cretaceous	Hatira	Israel	Marine	Goethite	0.2273	NA	-20.308	NA	30.96	10.36
IO-OM 25	106.75	Cretaceous	Hatira	Israel	Marine	Goethite	0.2331	NA	-19.87	NA	30.96	10.36
IO-OM 26	106.75	Cretaceous	Hatira	Israel	Marine	Goethite	0.2108	NA	-19.8366	NA	30.96	10.36
IO-OM 27	106.75	Cretaceous	Hatira	Israel	Marine	Goethite	0.1979	0.0017	-18.9441	0.0332	30.96	10.36
IO-OM 28	106.75	Cretaceous	Hatira	Israel	Marine	Goethite	0.2048	0.0001	-18.8526	0.0826	30.96	10.36
IO-OM 29	106.75	Cretaceous	Hidra	Israel	Marine	Goethite	0.6299	NA	-21.9237	NA	33.23	10.36
IO-OM 30	106.75	Cretaceous	Hidra	Israel	Marine	Goethite	0.5317	0.0169	-21.3406	0.1225	33.23	10.36
IO-OM 31	106.75	Cretaceous	Hidra	Israel	Marine	Goethite	0.5197	NA	-21.254	NA	33.23	10.36
IO-OM 32	106.75	Cretaceous	Hidra	Israel	Marine	Goethite	0.5877	NA	-21.1183	NA	33.23	10.36
IO-OM 33	106.75	Cretaceous	Hidra	Israel	Marine	Goethite	0.46	NA	-20.981	NA	33.23	10.36
IO-OM 34	106.75	Cretaceous	Hidra	Israel	Marine	Goethite	0.5796	0.0014	-20.8475	0.0248	33.23	10.36
IO-OM 35	106.75	Cretaceous	Hidra	Israel	Marine	Goethite	0.447	NA	-20.5551	NA	33.23	10.36
IO-OM 36	106.75	Cretaceous	Hidra	Israel	Marine	Goethite	0.5302	NA	-20.2163	NA	33.23	10.36
IO-OM 37	106.75	Cretaceous	Hidra	Israel	Marine	Goethite	0.478	NA	-20.0669	NA	33.23	10.36
IO-OM 38	106.75	Cretaceous	Hidra	Israel	Marine	Goethite	0.4631	0.0302	-19.7328	0.146	33.23	10.36
IO-OM 39	106.75	Cretaceous	Hidra	Israel	Marine	Goethite	0.4246	0.0009	-19.2111	0.221	33.23	10.36
IO-OM 40	106.75	Cretaceous	Hidra	Israel	Marine	Goethite	0.4465	0.0061	-19.0079	0.0292	33.23	10.36
IO-OM 41	106.75	Cretaceous	Hidra	Israel	Marine	Goethite	0.4367	NA	-18.9126	NA	33.23	10.36
IO-OM 42	106.75	Cretaceous	Hidra	Israel	Marine	Goethite	0.4518	NA	-18.8917	NA	33.23	10.36
IO-OM 43	106.75	Cretaceous	Hidra	Israel	Marine	Goethite	0.4506	0.0156	-18.8564	0.0462	33.23	10.36
IO-OM 44	106.75	Cretaceous	Hidra	Israel	Marine	Goethite	0.4053	NA	-18.596	NA	33.23	10.36
IO-OM 45	106.75	Cretaceous	Hidra	Israel	Marine	Goethite	0.4139	NA	-18.526	NA	33.23	10.36
IO-OM 46	106.75	Cretaceous	Hidra	Israel	Marine	Goethite	0.4008	NA	-18.3441	NA	33.23	10.36
IO-OM 47	106.75	Cretaceous	Hidra	Israel	Marine	Goethite	0.4087	NA	-18.3367	NA	33.23	10.36
IO-OM 48	106.75	Cretaceous	Hidra	Israel	Marine	Goethite	0.3663	NA	-16.703	NA	33.23	10.36
IO-OM 49	160.4	Jurassic	Arroyofrio Bed	Spain	Marine	Goethite	0.3829	NA	-22.6263	NA	40.34	25.7
IO-OM 50	161.75	Jurassic	Arroyofrio Bed	Spain	Marine	Goethite	0.4456	0.0018	-22.136	0.1265	40.34	25.7
IO-OM 51	162.75	Jurassic	Ferrous oolites of Villers	France	Marine	Goethite	0.4323	NA	-21.9601	NA	49	30.72
IO-OM 52	162.75	Jurassic	Ferrous oolites of Villers	France	Marine	Goethite	0.4468	0.0452	-21.4919	0.1586	49	30.72
IO-OM 53	164.8	Jurassic	Ifenthal	Switzerland	Marine	Goethite	0.3153	0.019	-20.9697	0.3812	47.48	32.42
IO-OM 54	164.8	Jurassic	Wutach	Switzerland	Marine	Goethite	0.4106	0.0014	-22.8226	0.0371	47.48	32.42
IO-OM 55	164.8	Jurassic	Wutach	Switzerland	Marine	Goethite	0.2871	0.0014	-21.7303	0.0827	47.48	32.42
IO-OM 56	167.2	Jurassic	Parkinsoni-Wurtt.-Schichten	Switzerland	Marine	Goethite	0.6177	0	-25.4776	0	47.48	32.42
IO-OM 57	167.2	Jurassic	Humphriesioolith	Switzerland	Marine	Goethite	0.3613	0.0053	-22.7055	0.0671	47.48	32.42
IO-OM 58	167.2	Jurassic	Humphriesioolith	Switzerland	Marine	Goethite	0.4535	0.0101	-24.046	0.021	47.48	32.42
IO-OM 59	169.3	Jurassic	Wedelsandstein (Blaukalk member)	Germany	Marine	Goethite	0.4757	NA	-25.8603	NA	48.21	31.93
IO-OM 60	169.3	Jurassic	Wedelsandstein (Blaukalk member)	Germany	Marine	Goethite	0.4671	NA	-24.9431	NA	48.21	31.93
IO-OM 61	169.3	Jurassic	Oolite Ferrugineuse de Bayeux	France	Marine	Goethite	0.9585	NA	-24.6951	NA	49.26	30.72
IO-OM 62	169.3	Jurassic	Oolite Ferrugineuse de Bayeux	France	Marine	Goethite	0.8951	NA	-24.6032	NA	49.26	30.72
IO-OM 63	169.3	Jurassic	Humphriesi-Schichten	Switzerland	Marine	Goethite	0.4448	0.0039	-24.0353	0.0664	47.48	32.42
IO-OM 64	169.3	Jurassic	Humphriesioolith	Switzerland	Marine	Goethite	0.4009	0.0078	-22.1872	0.1729	47.48	32.42
IO-OM 65	463.4	Ordovician	Aseri	Estonia	Marine	Goethite	0.2115	0.0083	-27.2445	0.3106	59.42	-40
IO-OM 66	463.4	Ordovician	Aseri	Estonia	Marine	Goethite	0.2056	0.0006	-26.3975	0.8383	59.42	-40
IO-OM 67	463.4	Ordovician	Aseri	Estonia	Marine	Goethite	0.2205	NA	-24.2363	NA	59.42	-40
IO-OM 68	463.4	Ordovician	Aseri	Estonia	Marine	Goethite	0.206	0.0008	-26.4148	0.6101	59.42	-40
IO-OM 69	465.65	Ordovician	Sillaoru	Estonia	Marine	Goethite	0.1857	0.0046	-23.3849	0.0224	59.37	-40
IO-OM 70	465.65	Ordovician	Sillaoru	Estonia	Marine	Goethite	0.224	0.0558	-24.1302	1.2365	59.37	-40
IO-OM 71	465.65	Ordovician	Sillaoru	Estonia	Marine	Goethite	0.2408	0.0027	-24.7464	0.0705	59.37	-40
IO-OM 72	377.45	Devonian	Presles	Belgium	Marine	Hematite	0.0302	0.0006	-27.5778	0.4954	50.375	NA
IO-OM 73	377.45	Devonian	Presles	Belgium	Marine	Hematite	0.0328	0.0021	-26.6316	0.1664	51.375	NA
IO-OM 74	377.45	Devonian	Presles	Belgium	Marine	Hematite	0.0308	NA	-26.5113	NA	52.375	NA
IO-OM 75	430	Silurian	Clinton Gr	USA	Marine	Hematite	0.2147	0.011	-28.8803	0.0206	40.78	-23.5
IO-OM 76	430	Silurian	Clinton Gr	USA	Marine	Hematite	0.1973	NA	-28.7885	NA	40.78	-23.5
IO-OM 77	430	Silurian	Clinton Gr	USA	Marine	Hematite	0.1512	NA	-25.2635	NA	40.78	-23.5
IO-OM 78	462.5	Ordovician	The Skovde Limestone	Sweden	Marine	Hematite	0.2796	NA	-29.7424	NA	58.41	-38.5
IO-OM 79	462.5	Ordovician	The Skovde Limestone	Sweden	Marine	Hematite	0.327	NA	-28.3649	NA	58.41	-38.5
IO-OM 80	462.5	Ordovician	The Skovde Limestone	Sweden	Marine	Hematite	0.3694	NA	-27.618	NA	58.41	-38.5
IO-OM 81	465	Ordovician	Sarka	Czechia	Marine	Hematite	0.1526	0.0354	-29.0162	0.0855	50.039	11.3
IO-OM 82	465	Ordovician	Sarka	Czechia	Marine	Hematite	0.1583	NA	-28.5794	NA	50.039	11.3
IO-OM 83	492	Cambrian	Bliss sandstone	USA	Marine	Hematite	0.0477	NA	-32.398	NA	32.7608	NA
IO-OM 84	492	Cambrian	Bliss sandstone	USA	Marine	Hematite	0.0463	NA	-29.7687	NA	33.7608	NA
IO-OM 85	492	Cambrian	Bliss sandstone	USA	Marine	Hematite	0.0663	0.0282	-29.3417	0.4112	34.7608	NA
IO-OM 86	492	Cambrian	Bliss sandstone	USA	Marine	Hematite	0.0983	0.021	-28.174	1.1724	35.7608	NA
IO-OM 87	492	Cambrian	Bliss sandstone	USA	Marine	Hematite	0.0705	NA	-26.2325	NA	36.7608	NA
IO-OM 88	492	Cambrian	Bliss sandstone	USA	Marine	Hematite	0.0733	NA	-25.6296	NA	37.7608	NA
IO-OM 89	750	Tonian	Galeros	USA	Marine	Hematite	0.0604	NA	-27	NA	36.1761	18
IO-OM 90	750	Tonian	Galeros	USA	Marine	Hematite	0.0404	NA	-26.9351	NA	36.1761	18
IO-OM 91	850	Tonian	McClure	USA	Marine	Hematite	0.0775	0.0247	-28.2633	0.1446	64.49	11
IO-OM 92	850	Tonian	McClure	USA	Marine	Hematite	0.0528	NA	-28.0288	NA	64.49	11
IO-OM 93	1460.5	Calymmian	Sherwin	Australia	Marine	Hematite	0.1766	0.0031	-27.2117	0.079	-14.2157	NA
IO-OM 94	1460.5	Calymmian	Sherwin	Australia	Marine	Hematite	0.1613	0.0054	-26.6876	0.3564	-14.2157	NA
IO-OM 95	1460.5	Calymmian	Sherwin	Australia	Marine	Hematite	0.135	NA	-26.0675	NA	-14.2157	NA
IO-OM 96	1460.5	Calymmian	Sherwin	Australia	Marine	Hematite	0.0292	0.0016	-25.6378	0.4986	-14.2157	NA
IO-OM 97	1460.5	Calymmian	Sherwin	Australia	Marine	Hematite	0.0902	0.0132	-24.717	0.2375	-14.2157	NA
IO-OM 98	1653.5	Statherian	Chuanlinggou	China	Marine	Hematite	0.1394	0.0257	-28.8399	0.1316	41.9748	NA
IO-OM 99	1653.5	Statherian	Chuanlinggou	China	Marine	Hematite	0.0558	NA	-25.1736	NA	41.9748	NA
IO-OM 100	1653.5	Statherian	Chuanlinggou	China	Marine	Hematite	0.1745	0.0052	-30.4467	0.1115	41.9748	NA
